# Supplementary material for: Engineering oxygen vacancies towards self-activated BaLuAlxZn4−xO7−(1−x)/2photoluminescent materials: an experimental and theoretical analysis
Source: Royal Society of Chemistry journal article supplement (doi:10.1039/c5cp05130d), 2015-01-01
Supplement: c5cp05130d1.pdf [file c5cp05130d1.pdf]

# Engineering Oxygen Vacancies towards Self-Activated BaLuAl<sub>x</sub>Zn<sub>4-x</sub>O<sub>7-(1-x)/2</sub> Photoluminescent Materials: An Experimental and Theoretical Analysis

Lan Ma<sup>a</sup>, Zhiguo Xia<sup>\*a</sup>, Victor Atuchin<sup>b,c,d</sup>, Maxim Molokeev<sup>e,f</sup>, S. Auluck<sup>g,h</sup>, A. H. Reshak<sup>i,j</sup>, Quanlin Liu<sup>a</sup>

## Supporting Information

### Details of DFT calculation and level of theory:

The full potential linearized augmented plane wave (FPLAPW) method [1] is a procedure for solving the Kohn-Sham equations for the ground state density, total energy, and (Kohn-Sham) eigenvalues of a many-electron system by using a basis set. In FPLAPW method we divide the unit cell into (I) non-overlapping atomic spheres (centered at the atomic sites) and (II)

an interstitial region. In the interstitial region a plane wave expansion is used  $\Phi_{k_n} = \frac{1}{\sqrt{\Omega}} e^{ik_n \cdot r}$

$$; \quad \text{with} \quad k_n = \kappa + K_n \quad (1)$$

where  $\kappa$  is the wave vector in the Brillouin zone (BZ),  $K_n$  is a reciprocal lattice vectors and  $\Omega$  is the volume of the unit cell. Each plane wave is augmented by an atomic-like function in every atomic sphere. Inside each atomic sphere, the solutions for a spherically symmetric potential are the atomic basis functions which consist of radial functions,  $u_l(r, E)$ , multiplied by spherical harmonics.

For typical valence states with azimuthal quantum number  $l$ , the radial function is regular at the origin and varies with energy. This energy dependence is linearized by selecting an expansion energy  $E_l$ , near the center of the band and writing the atomic function as:

$$\Phi_{k_n} = \sum_{lm} [A_{lm,k_n} u_l(r, E_l) + B_{lm,k_n} \frac{\partial u_l}{\partial r}(r, E_l)] Y_{lm}(\hat{r}) \quad (2)$$

where  $u_l$  is solution of the radial Schrödinger equation and  $\frac{\partial u_l}{\partial r}$  is its energy derivative. For each atom and  $lm$  there are two free coefficients,  $A_{lm}$  and  $B_{lm}$ , which are chosen such that (at the sphere boundary) the plane wave with wave vector,  $k_n$ , joins continuously on to the atomic function value and slope.

These linearized augmented plane waves (LAPW's) form the basis for expanding the crystalline orbitals ( Bloch states) and provide a rapidly converging series.

$$\Psi_{\kappa} = \sum_n C_n \Phi_{k_n} \quad (3)$$

All low lying core states are included as frozen core states ( $k$  independent but but calculated self-consistently by solving an atomic Dirac equation.

Sometimes it is necessary to extend the LAPW basis set with so called local orbitals (LO's)[2]. With such an extension, higher-level semi-core states can be treated, together with the valence states, in one LAPW calculation instead of two (valence and semi-core states) energy windows. This LO scheme avoids the problem of non-orthogonality that can occur in calculations in which the semi-core states are either frozen or treated in separate energy window. A LO is chosen such that it vanishes in value and slope at the muffin-tin radius and includes an additional radial function, corresponding to a different principle quantum number:

$$\Phi_{lm}^{LO} = [A_{lm}u_l(r, E_{1,l}) + B_{lm}u_l(r, E_{1,l}) + C_{lm}u_l(r, E_{2,l})] Y_{lm}(\hat{r}). \quad (4)$$

The LO is then added to usual LAPW basis set in equation (3). The inclusion of LO's makes the computation of matrix elements somewhat more difficult but one has a better model and saves computational time, since no semi-core states need to be calculated in separate LAPW run.

In FPLAPW method the potential and charge density are expanded (a) into lattice harmonics (inside each atomic sphere) and (b) as a Fourier series (in interstitial region) and thus they are completely general, so that the scheme is termed as full-potential calculation

$$\begin{aligned} \sum_{LM} V_{LM}(\hat{r}) Y_{LM}(\hat{r}) & \quad \text{Inside sphere} \\ V(\hat{r}) = & \\ (5) \quad \sum_K V_K \exp(i\mathbf{K} \cdot \mathbf{r}) & \quad \text{Outside sphere} \end{aligned}$$

In order to have few  $LM$  values in the lattice harmonics equation (5), a local coordinate system for each atom sphere is defined, according to the point symmetry of the corresponding atom. This specifies a rotation matrix that relates the local to the global coordinate system of the unit cell.

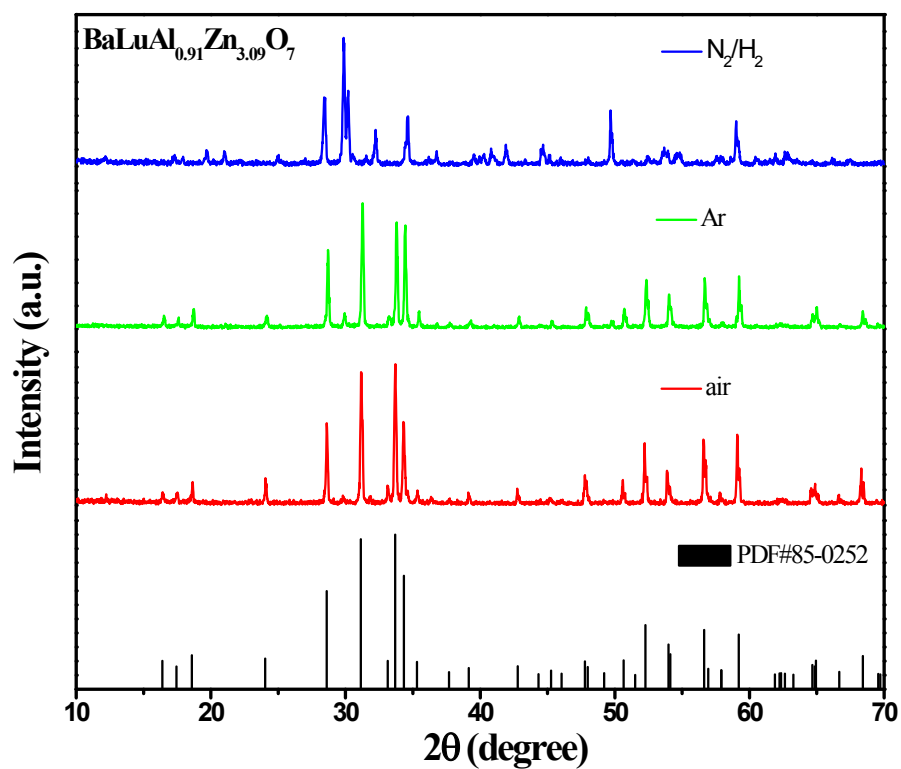

**Fig. S1.** XRD patterns of nominal  $\text{BaLuAl}_{0.91}\text{Zn}_{3.09}\text{O}_7$  phase prepared at different atmosphere, and the standard pattern (PDF# 85-0252) of  $\text{BaLuAl}_{0.91}\text{Zn}_{3.09}\text{O}_7$  is also given as a comparison.

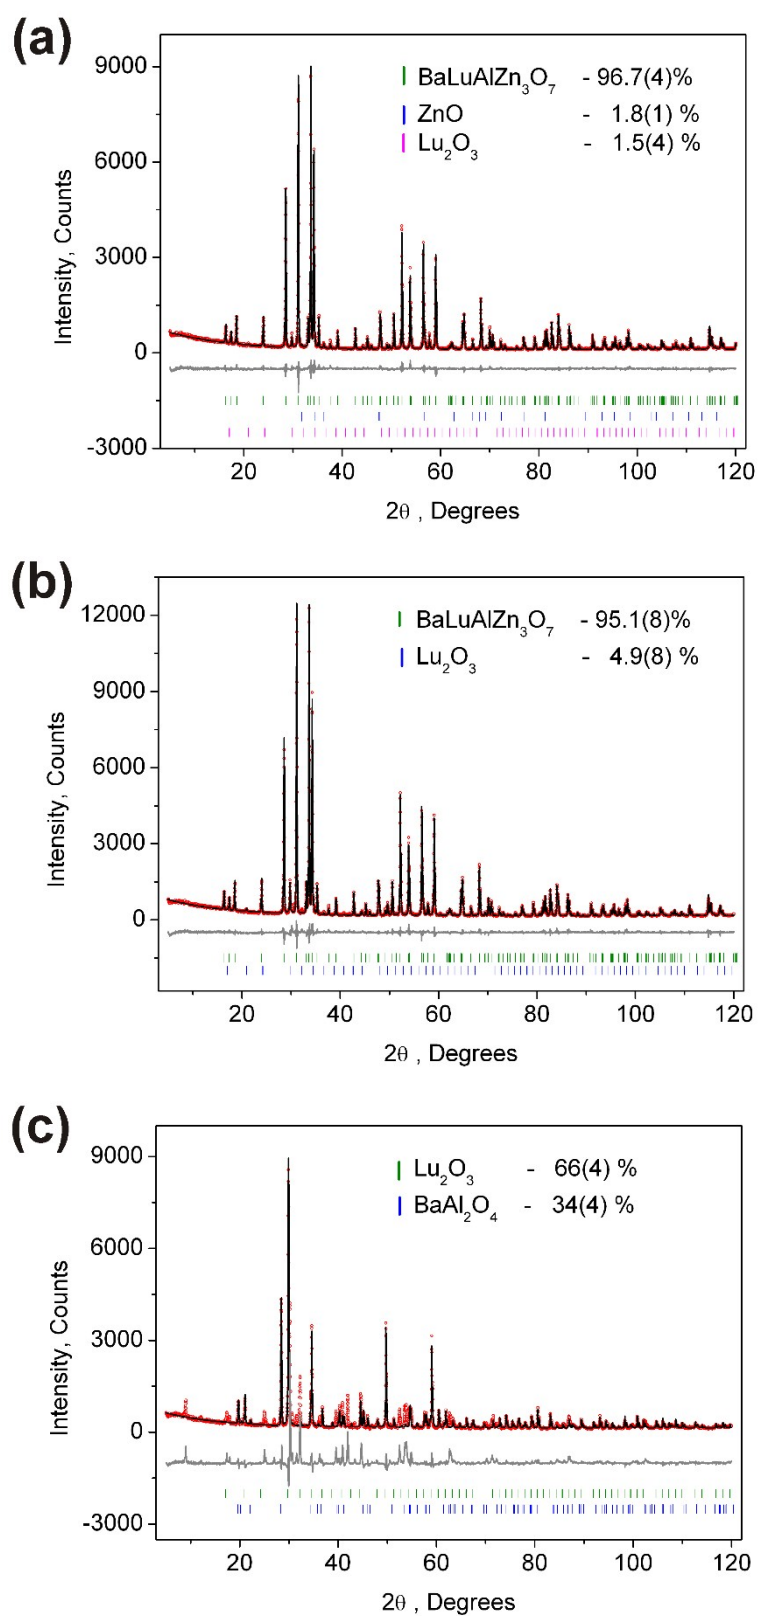

**Fig. S2.** Difference Rietveld plot BaLuAl<sub>0.91</sub>Zn<sub>3.09</sub>O<sub>7</sub> prepared in air (a), Ar (b), and N<sub>2</sub>-H<sub>2</sub> (c) atmosphere.

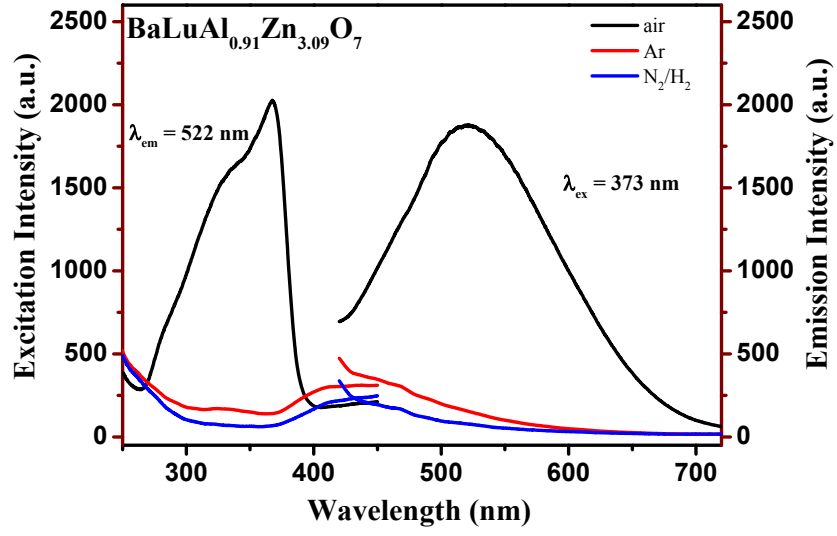

**Fig. S3.** Photoluminescence excitation (left) and emission (right) spectra of nominal  $\text{BaLuAl}_{0.91}\text{Zn}_{3.09}\text{O}_7$  phase prepared at different atmosphere.

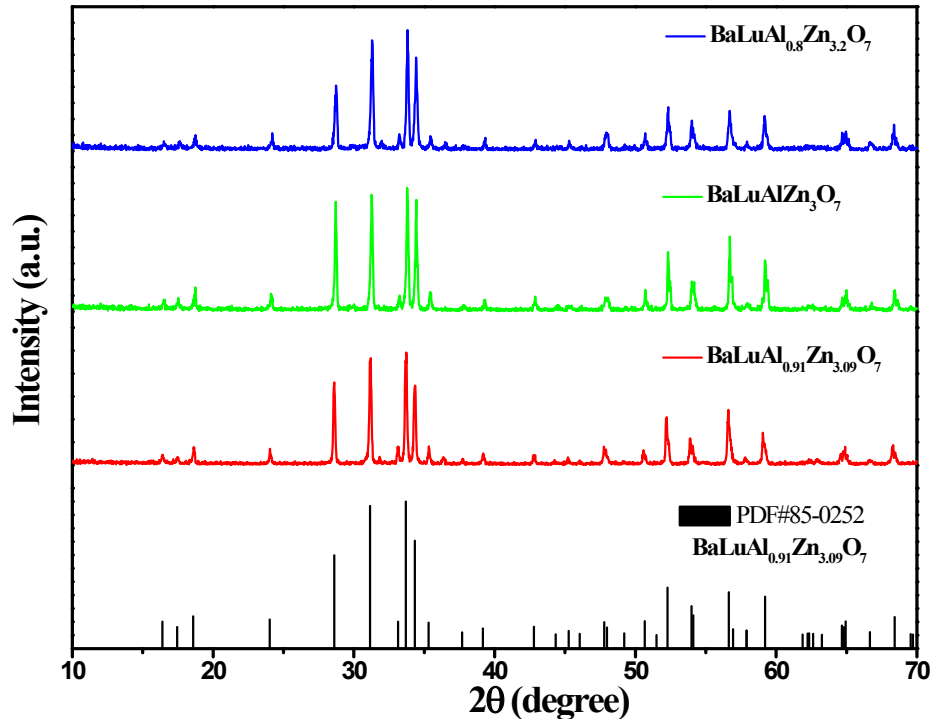

**Fig. S4.** XRD patterns of the  $\text{BaLuAlZn}_3\text{O}_7$ ,  $\text{BaLuAl}_{0.91}\text{Zn}_{3.09}\text{O}_7$  and  $\text{BaLuAl}_{0.8}\text{Zn}_{3.2}\text{O}_7$  samples depending on different Al/Zn ratio.

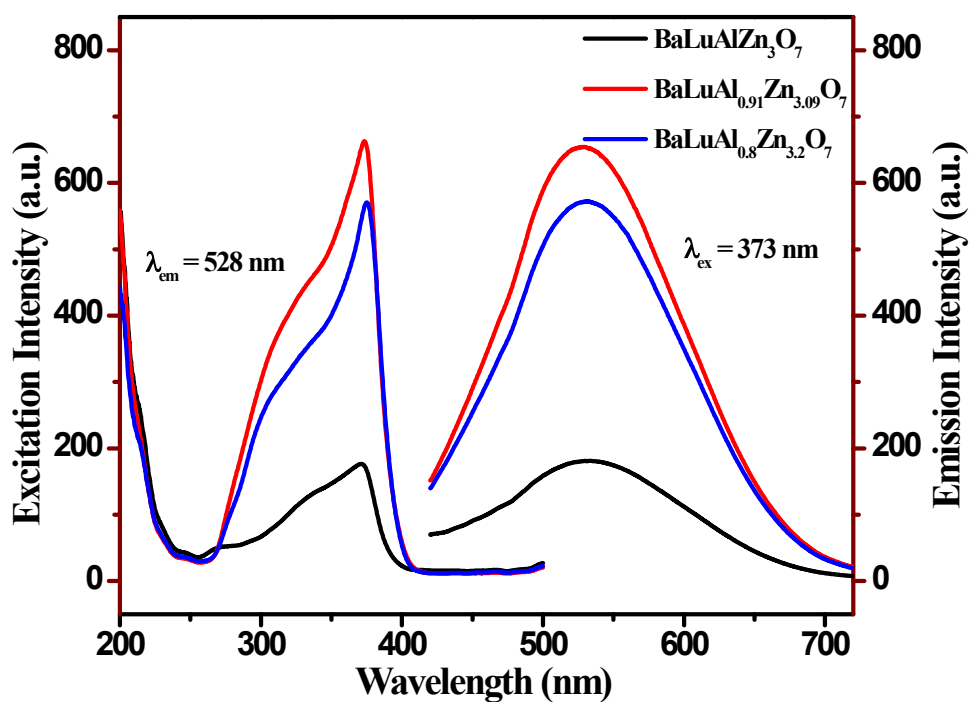

**Fig. S5.** Photoluminescence excitation (left) and emission (right) spectra of BaLu(Al,Zn)O<sub>7</sub> depending on different Al/Zn ratio, (a) Al/Zn = 1:3, (b) Al/Zn = 0.91/3.09, (c) Al/Zn = 0.8/3.2.

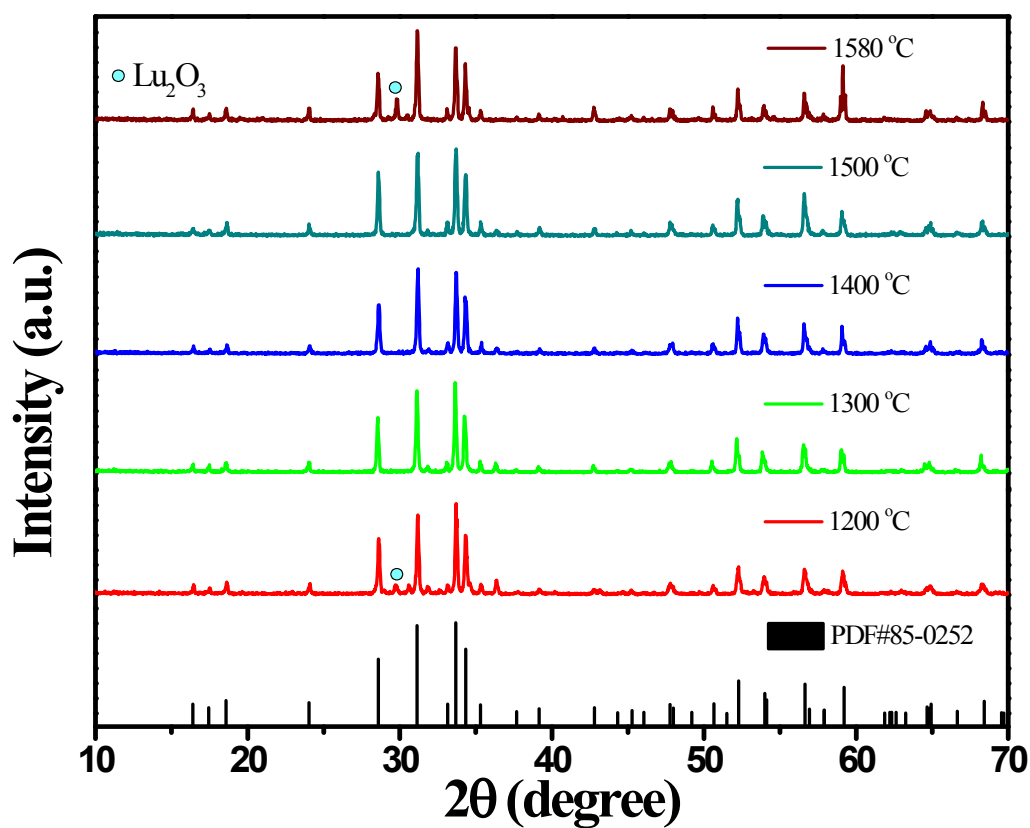

**Fig. S6.** XRD patterns of BaLuAl<sub>0.91</sub>Zn<sub>3.09</sub>O<sub>7</sub> phosphors prepared at different annealing temperatures.

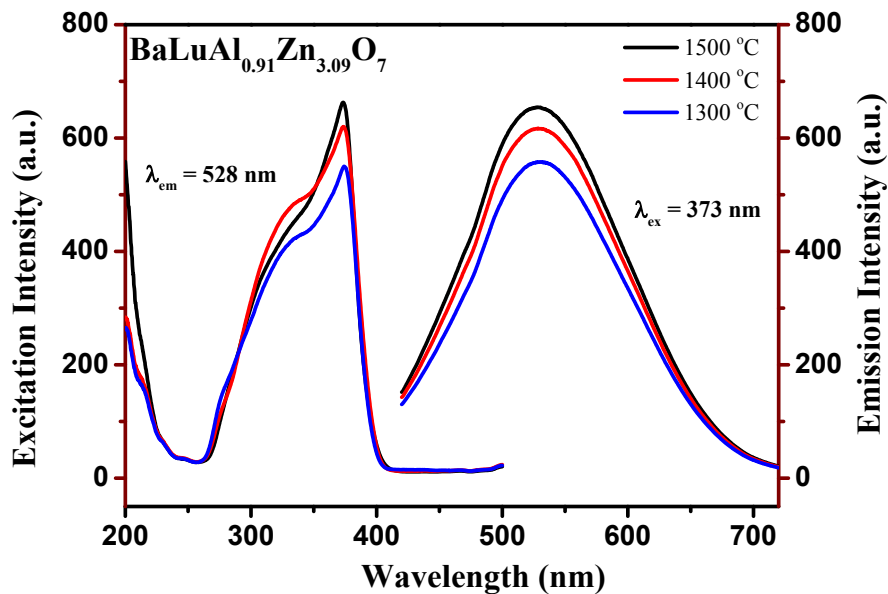

**Fig. S7.** Photoluminescence excitation (left) and emission (right) spectra of  $\text{BaLuAl}_{0.91}\text{Zn}_{3.09}\text{O}_7$  phosphors prepared at different annealing temperatures.

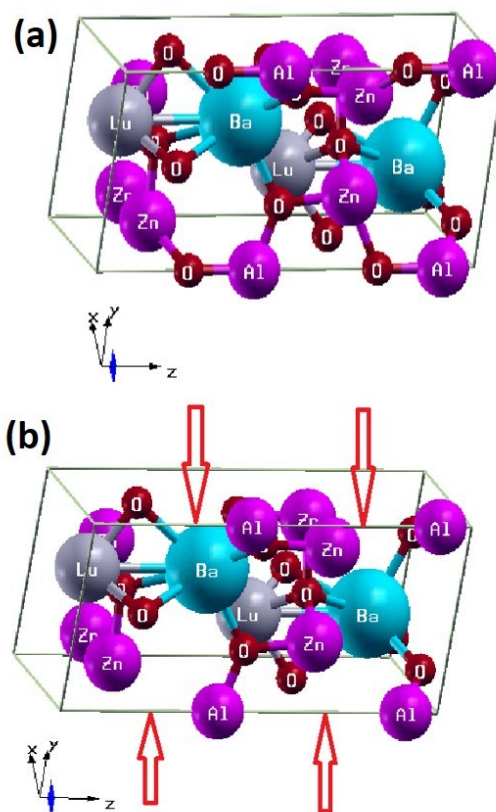

**Fig. S8.** Relaxed unit cells of (a)  $\text{BaLuAl}_{0.91}\text{Zn}_{3.09}\text{O}_7$  and (b) that with two oxygen vacancies introduced at Q1 and O3 sites.

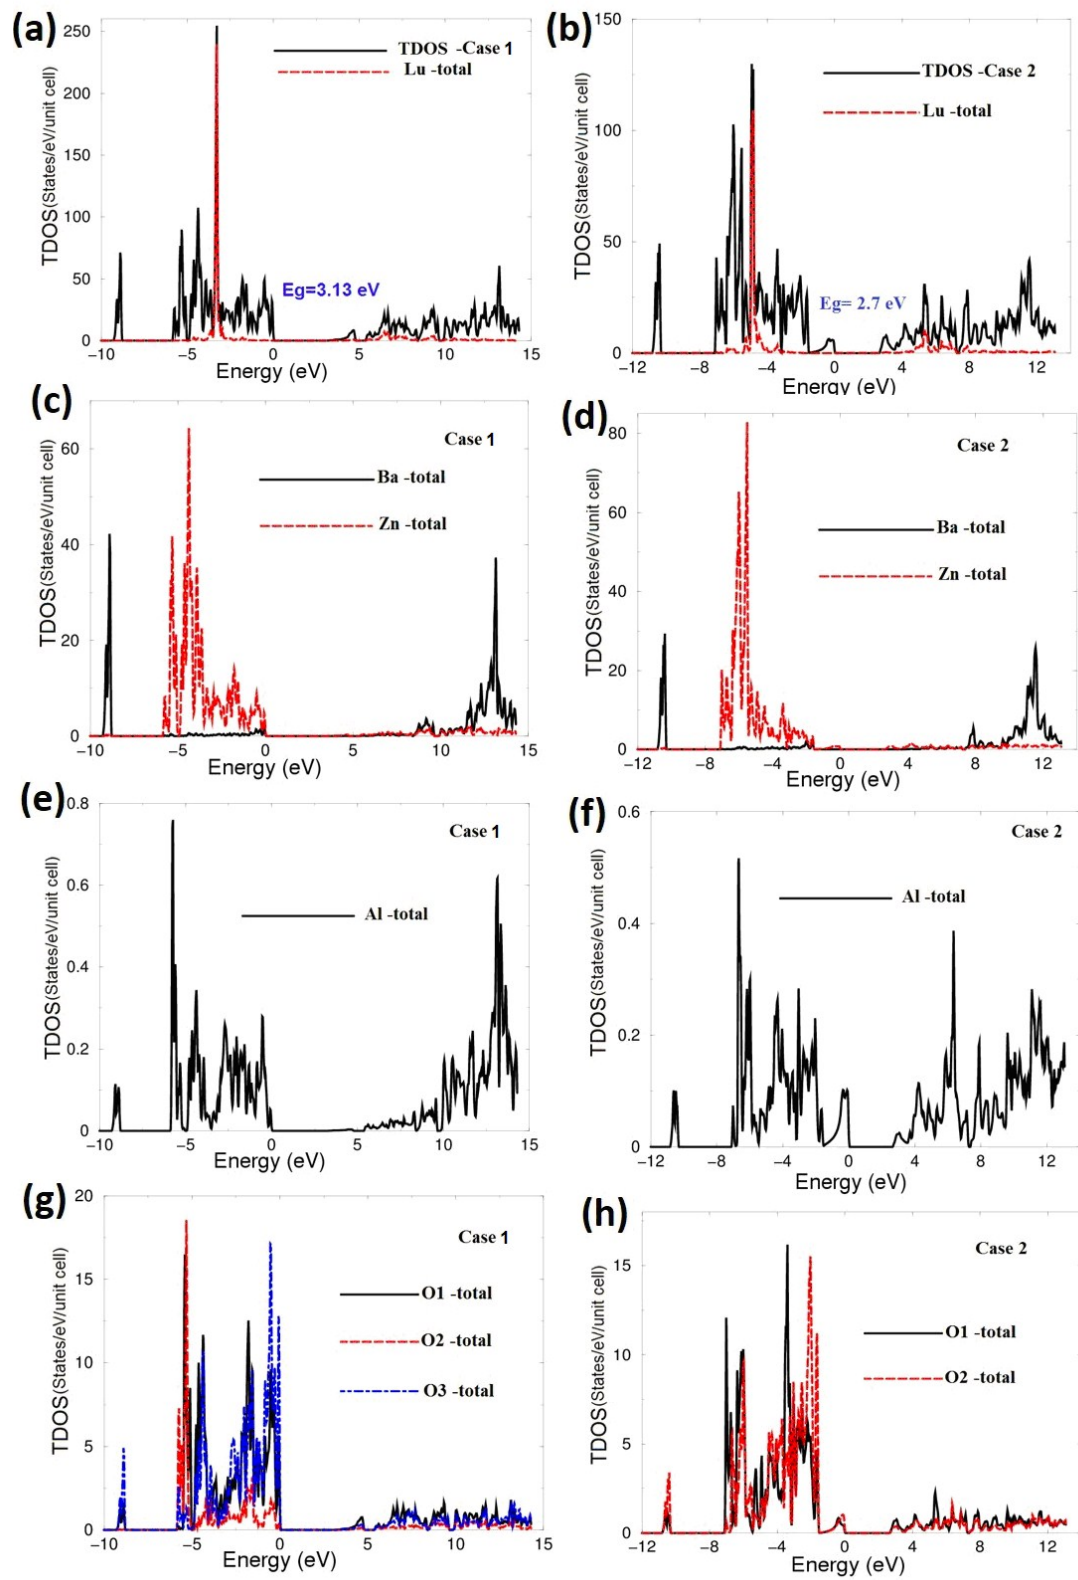

**Fig. S9.** Total DOS and partial DOS of constituted atoms for stoichiometric and defected BaLuAl<sub>0.91</sub>Zn<sub>3.09</sub>O<sub>7</sub> phosphor for different cases.

## References

- [1] Blaha, P.; Schwarz, K.; Madsen, G. K. H.; Kvasnicka, D.; Luitz, J. WIEN2k, An augmented plane wave plus local orbitals program for calculating crystal properties, Vienna University of Technology, Austria (2001)
- [2] Sing D. J., Phys. Rev. B 43, 6388 (1991).
